# Supplementary material
Source: PubMed Central journal article supplement (PMC452587)

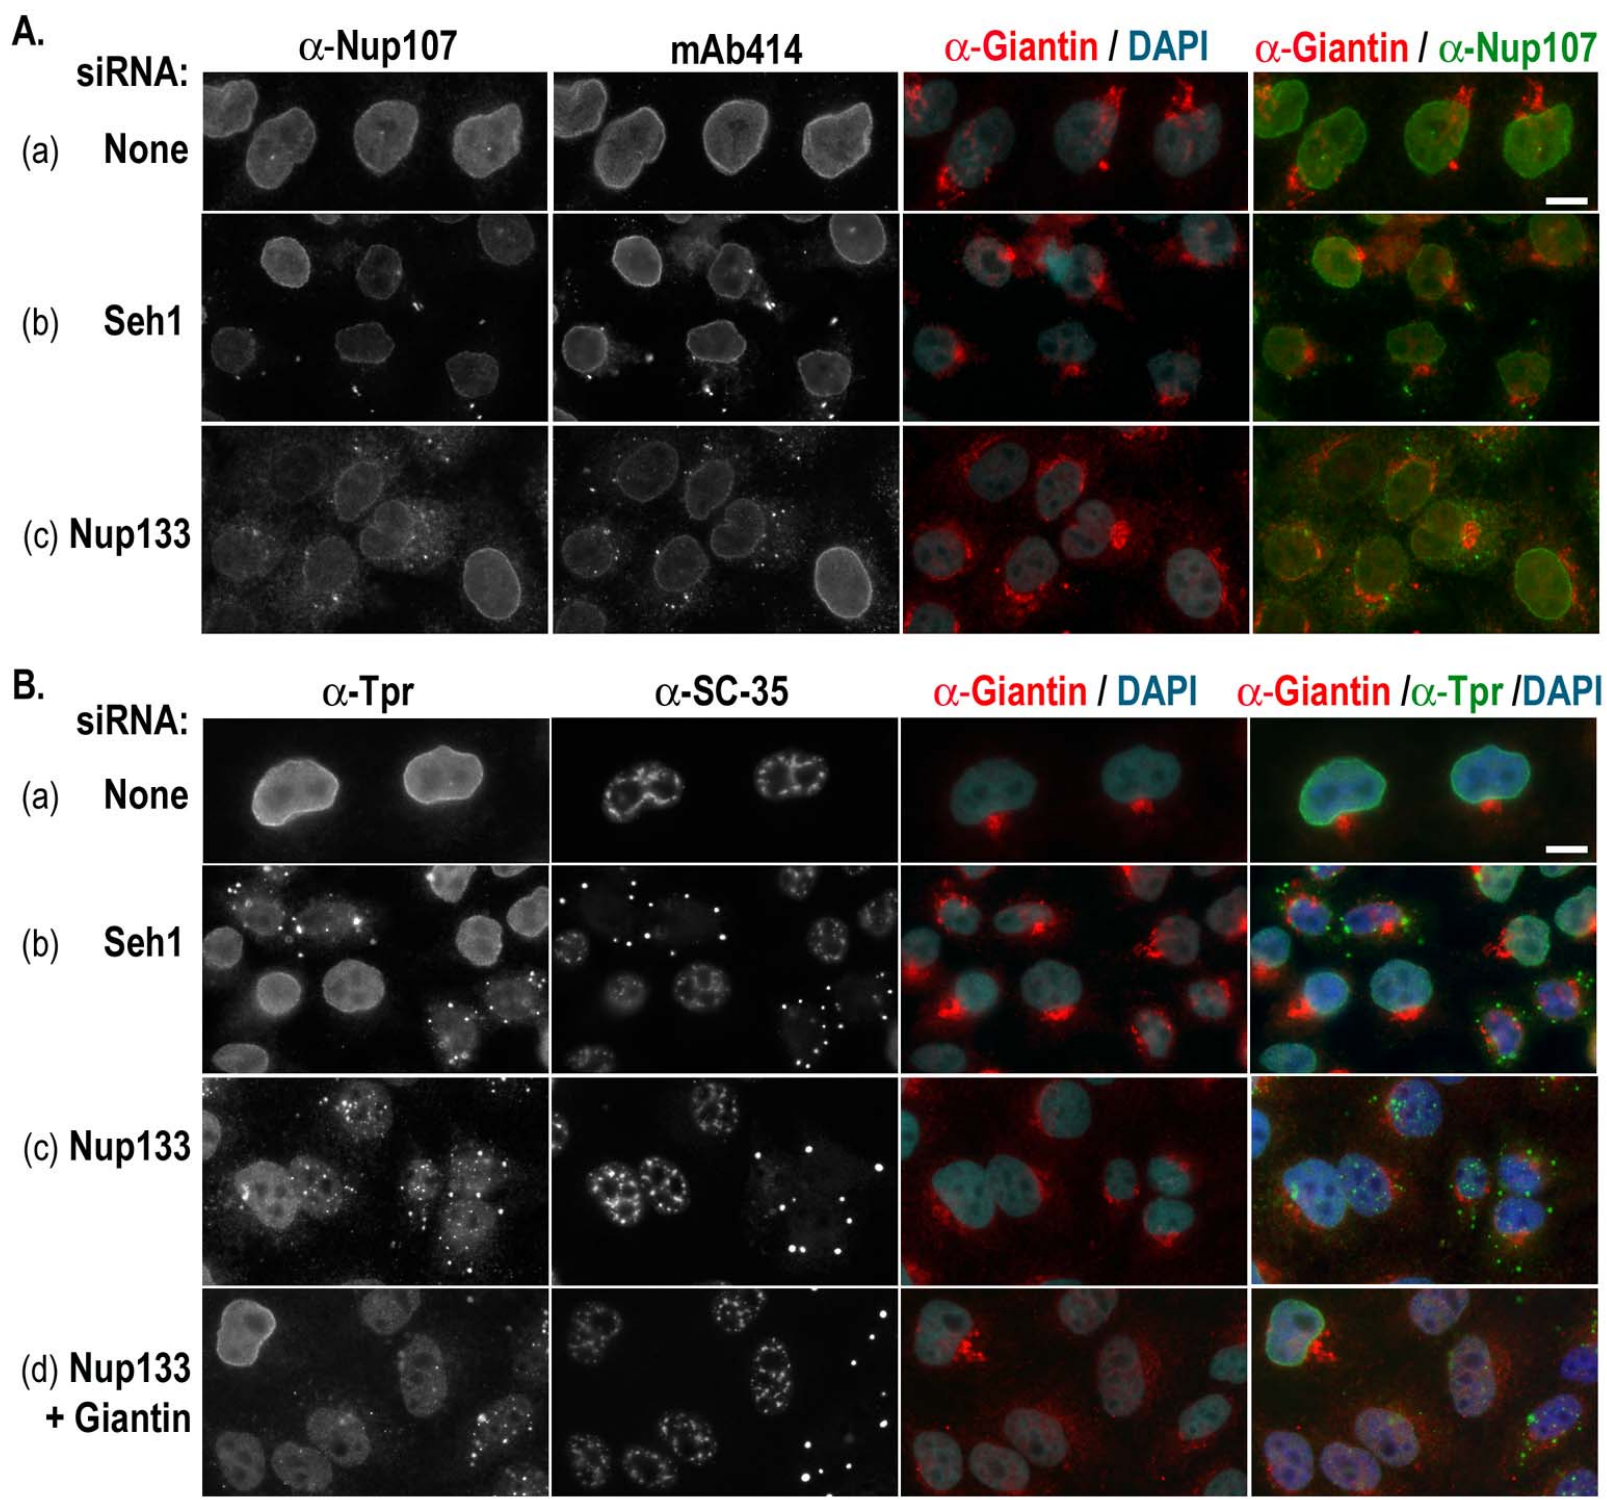

Figure S1

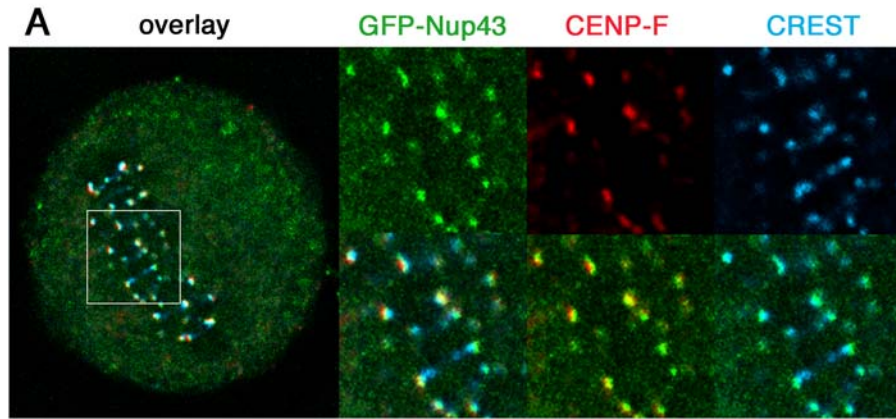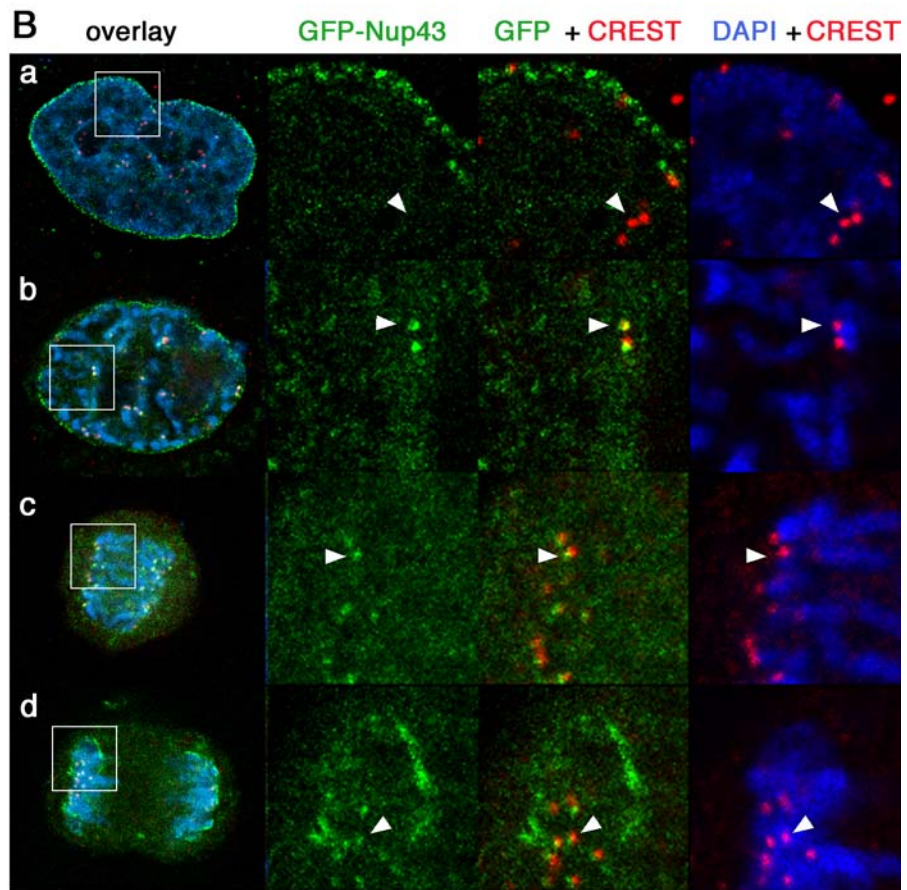

Figure S2

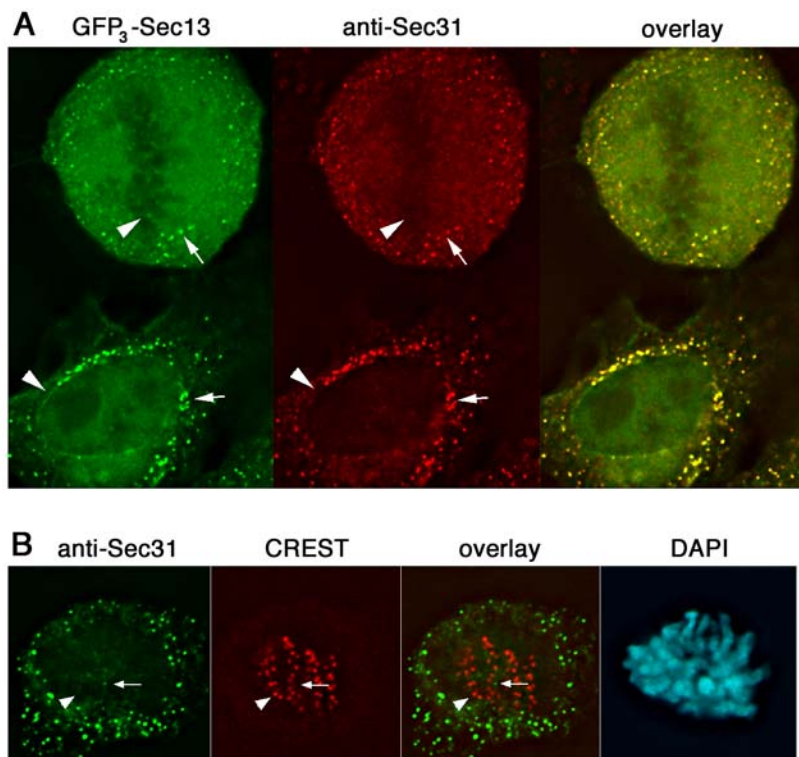

Figure S3

Supplement: mbc_15_7_3333__1.pdf [file mbc_15_7_3333__1.pdf]
